# Supplementary material for: Assessing the Use of the sGC Stimulator BAY-747, as a Potential Treatment for Duchenne Muscular Dystrophy
Source: MDPI journal article supplement (doi:10.3390/ijms22158016), 2021-07-27
Supplement: s1 [file s1]

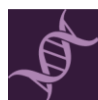

## Supplementary Methods

**Supplementary Table S1: Primer/probe sequence of genes analyzed**

| Target Gene | Forward                      | Reverse                   | Probe                              |
|-------------|------------------------------|---------------------------|------------------------------------|
| NOS1        | TATGTACAGGACGTGCTGCA         | GCCTCCTTGCTCCTTCAGG       | CAGCTGGCCGAGTCTGTGTAC-CGC          |
| NOS2        | TTGCTCCCTTCCGAAGTTTCT        | CCTCCTTTGAGCCCTTTGTG      | CAGCGGCTCCATGACTCCCA               |
| NOS3        | CTGGATGAAGCCGGTGAC           | GCAATGTGAG-TCCGAAAATG     | CTGCGGGATCAGCAACGCTACC             |
| NOX1        | GTGGGGGTTTTCTTATGTGG         | CCAGACTCGAG-TATCGCTGA     | ACTTTGGCAAAAAGCCTGCG-CAAAC         |
| NOX2        | CACCACAATAGGCGTTTTCC         | CGGATTCTGAGTTGGA-GATGC    | CCCTGAAGCCTT-GGCTGAAACTCTCA        |
| NOX4        | ATTGGGCGTCCTCGGTGGAA         | TGGGTCCACAG-CAGAAAATC     | ATAGCAAAATGTAACAGAGGGA-AAACAGT     |
| GUCY1A1     | CGTCTTTTAGAGATGGAGA-TAGAGCTT | TCACACCGCTTGGGTGA-GAATA   | TGACAAAGCACTTGTCTAG-CATTTAGGCAGTCC |
| GUCA1A2     | CCAGACAACTTTCCGAAGGA         | GGCTTTGGGTCAG-TCCTTAAC    | TTCTGGGGTCTGC-TATTCCTGGA           |
| GUCY1B1     | TCTGTT-GCCAATGAGCTGAGA       | AGGATGGTCACATTGTGCTATCTTT | CAAGCGCCCAGTGCCTGCC                |
| GUCY1B2     | CAGGTGTTGTGGGAGACAAG         | TCCTA-GAGGCCGTGTTTACG     | CCCGGTACTGCCTGTTT-GGTGACAC         |
| PRKG1       | GAGGGCTTTAATTGGGAAGG         | TGCTTGTGTCTGTGGGTGA       | CACCTCCCATAATTCCAAGTGT-GCG         |
| PRKG2       | TGGCCGAGGGTAGACTTGAG         | AATAGCCAG-TTCCCCAAACGT    | CCAGGGAGAGAAGTTGC-TATCATCCATCC     |
| PDE1a       | GACGAGGTCGGACGTTGCT          | CTGCGCTGACGTGGTGATT       | TTCTGTACAACGACCGCTCAG-TGCTTGA      |
| PDE1b       | GACTCGG-CATAGCCTCATCAG       | ATAGCCTGTCTCCAAGGCC TC    | CGCTTTAAGATTCCCACAG-TGTTTCTGATGA   |
| PDE1c       | CCACCGGCTGTAATCGATG          | TGGCCTCATT-GAGGGAAAAG     | CGAAGGACCAC-GTATCCACATCCTTCA       |
| PDE2a       | ATCCTGAACATCCCAGATGC         | AGGGAAGCAGA-GAATGTTGC     | CCCATCCGCTTTTCTATCGCGG             |
| PDE3a       | AGAGCAGATCCAGGC-TATCAA       | CCAGGGTCTCCTCTGCTCTT      | AGGAAGAGGAAGAGAAGGG-GAAGCC         |
| PDE3b       | TGGATCGTTCTTCTCCTCAA         | CAGCATCATAGGAGTT-GCACA    | CTTTTATCACCCACATT-GTGGGCCC         |
| PDE4a       | CAAATGGGGCCTGAACAT           | ACATGATACAGCTGAG-TGAACG   | TTTGTGTGTCGGAGTACGCTG-GAGG         |
| PDE4b       | CAACGCCAGACACTCAG-GAA        | GGAGGCTCATGTGTTT-GGACA    | TGGTGATTGACATGGTGTGG-CAACTG        |
| PDE4c       | CCACACCAGCCTTCCCACAG         | CTGCTCCTCCTGATCTGTCT      | ATCCACGCTTTGGGGTCC                 |
| PDE4d       | CTCGGAACTCGCTCTGATGT         | ACTTAAAGCCAC-CGCCAAG      | CAACGACTCCTCGGTCCTAGA-GAACCATCA    |
| PDE5a       | CCGACTTCAGCTTCAG-TGACTT      | GGTCAG-TGAACATCCGAATTG    | TGTCTGATCTG-GAAACAGCGCTGTG         |

|               |                              |                                |                                    |
|---------------|------------------------------|--------------------------------|------------------------------------|
| PDE6a         | CATGCTGGATGGGATCACTA         | GCCTTCATCTTGGCTTCGTA           | AAGGAATGGAAGGCGCTGGCTGA<br>T       |
| PDE6b         | TCGATTTCACGAAGAGATCC         | TCGTCAGCTAG-<br>TGCTTTCCA      | CCCATGTTTGACCGACTG-<br>CAAAATA     |
| PDE6c         | CAGGCTGCTGAACGTCAC           | CCAGCCAAC-<br>TATCCCAATGT      | AGGACAACCTCGTGGCCCCCTGA            |
| PDE6d         | CGAGTTTGGCTTTGTGATCC         | ACTCAGGCGCTGCTTC-<br>TATC      | ACTCCACAAACACCTGGCAG-<br>TCCTT     |
| PDE6h         | AGCGTTCAGCCATCTGGA           | AGCCTCTGGGCTCCTCATA            | CATGAGCTTGCTCAGTTTCG-<br>GATCA     |
| PDE7a         | TGGAGGCTCAGATAGGTGCT         | CCAAGTGA-<br>GATCTAAACAATGACA  | CACGGATATCAGTCGCCAGAAC-<br>GAG     |
| PDE7b         | CTGGGCTCCCTCATCTTG           | TCTTTATTGTG-<br>GAGGTGAGCTTT   | CAGACAGAATGAG-<br>TTTCTGACCCGC     |
| PDE8a         | TCGTTGACCTGCCTAACCTT         | TTCGAA-<br>GCTTCTTCTCATCCA     | TGCAGCACCTA-<br>GATGACAACCTCAGG    |
| PDE8b         | CTGGATGACCTCAAGTGCAA         | TCACAGTGTCCCCTTCTCG            | CTTCCATCTGACAGCTGAA-<br>GCCACG     |
| PDE9a         | CATGGACCGAGA-<br>CAAAGTGA    | TGGGATCAG-<br>GACAAACTTGA      | AAGCAACAGCCCCAAATT-<br>GGTTCA      |
| PDE10a        | GAGCAGGTGCTGGAGATCAT         | TCCTCCAACTGCTTCCTGTT           | CGCAAAGCCATCATCGCCAC               |
| PDE11a        | TTTTCCCTTGATGTTGATGC         | TTCTGTAC-<br>CATCCCCAGCTC      | TCACAGCCGCTCTAC-<br>GGATGTTTCT     |
| TNF           | TCTCAAAATTTCGAG-<br>TGACAAGC | CAGCCACTCCAGCTGCTC             | CACGTCGTAGCAAACCAC-<br>CAAGTG      |
| SPP1          | ATTTGCTTTTGCCTGTTTG          | CTCCTCTGAGCTGCCAGAA<br>T       | CTCCTCCCTCCCGGTGAAAGTGAC<br>T      |
| IL-1 $\beta$  | GACCTTCCAGGATGAGGACA         | TGAGTCACAGAG-<br>GATGGGCT      | AGCACCTTCTTTTCTTCATCTTT-<br>GAAGAA |
| IL-6          | CGGACACTGGCTGTGGAATT         | GCCAGGATCTTGGGCAACT            | AAATGATGTCTGAAGTTATTGCTG<br>CC     |
| CCL2          | AAGAGGATCACCAGCAG-<br>CAG    | TTCTTGGGGTCAGCACAGA            | TCCCAAAGAAGCTGTAGTTTTT-<br>GTCACCA |
| ICAM1         | AACCAGACCCTGGAAGTGC          | AGGTCCAGTTCCCCAAGC             | TGCTGTATGGTCTCTCGGCTGGA            |
| COL1A1        | GACCTCAAGATGTGCCACTC         | AGGTTCAGCCTT-<br>GGTTAGG       | ACTGGAAGAGCGGAGAGTACTG-<br>GATC    |
| COL1A2        | TGCAGGGTTCCAACGATGTT         | CGACTAGGACAGAG-<br>TAGGTGAACCT | AACTTGTTGCTGAGGGC                  |
| COL3A1        | CTGGTGAGCGAGGAC-<br>GACCA    | GAATCCTGCAGTTCCAG-<br>GAGG     | CTCGAGGCAATGATGGTGCTCGG<br>GGCAG   |
| TGF $\beta$ 1 | TGAGTGGCTGTCTTTTGACG         | AGCCCTGTATTCCGTCTCCT           | ACTGGAGTTGTACGGCAG-<br>TGGCTGA     |
| TGF $\beta$ 2 | ACCTTTTTGCTCCTGCATCTG        | GTCGAGGGTGCTGCAGGTA            | TCCCGGTGGCGCTCAGTCTGT              |
| TGF $\beta$ 3 | CCCTATCAGGTCTGGCACTT         | CCTCTCCCCGTGCATCTCT            | AACAGCACCCGGGAGTTGCTGG             |
| MMP2          | CTATGTCCACTGTGGGTG-<br>GAAA  | TTGTTGCCAG-<br>GAAAGTGAAG      | CAGAAGGTGCCCCATGTGTCTTC            |
| MMP9          | CCTGGAACCTCACACGACATC        | GAAACTCACAC-<br>GCCAGAAGA      | CCAAGACAAAGCC-<br>TATTTCTGCCATGG   |
| TIMP1         | TGCCTGCCACGGAATCCAGG         | TCCTGGGG-<br>GAAGGCTTCAGGT     | TGCACCTGGAGATCCCTT-<br>GGGGCCCG    |

|             |                            |                            |                               |
|-------------|----------------------------|----------------------------|-------------------------------|
| TIMP3       | CCCCAGGATGCCTTCTG-<br>CAAC | CCTCCTTCAC-<br>CAGCTTCTTTC | CCGACATCGTGATCCGGGCCAAA       |
| ACTA2       | TTGCTGACAGGATGCAGAAG       | GTTCTGGAGGGGCAATGAT        | CTCGCACCCAGCACCATGAAGA        |
| Fibronectin | GTCATTGCCCTGAAGAACA        | AACCAGTTGGGGAA-<br>GTCAT   | AAGAGTGAGCCCCTGATTGG-<br>GAGG |
| CTGF        | CCGCCAACCGCAAGATC          | CACCGACCCACCGAAGAC         | TGTGCACTGCCAAAGATGGTG-<br>CAC |
| SERPINE     | CCCCACGGAGATGGTTATAG       | ATCACTTGGCCCATGAA-<br>GAG  | CGGCACAACCCGACAGAGACAA        |
| RPL32       | ACTGGAG-<br>GAAACCCAGAGGC  | CATCAG-<br>GATCTGGCCCTTGA  | TCGACAACAGGGTGCGGAGAAGG       |
