# Supplementary figures and images for: Assessing the Use of the sGC Stimulator BAY-747, as a Potential Treatment for Duchenne Muscular Dystrophy
Source: MDPI journal article supplement (doi:10.3390/ijms22158016), 2021-07-27

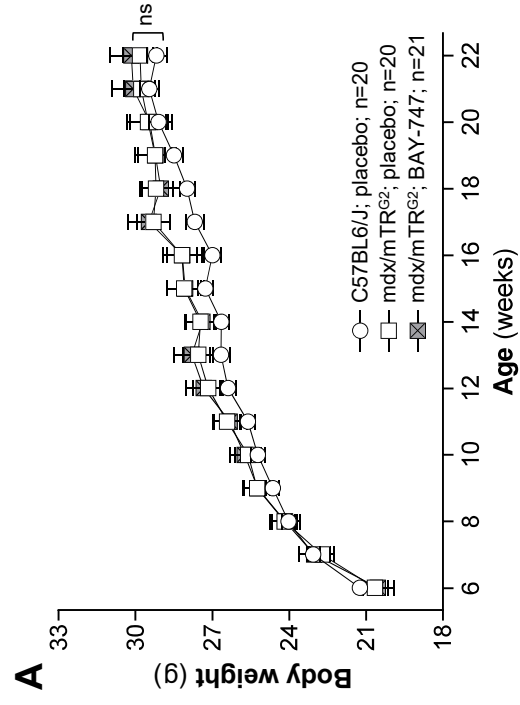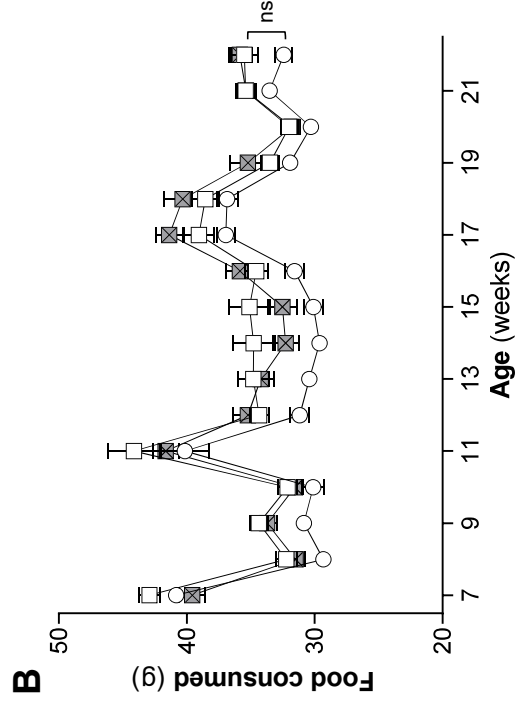

Supplementary Figure S1

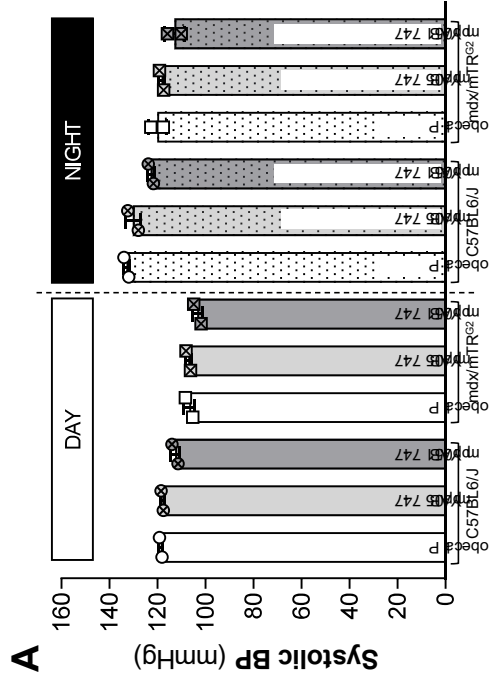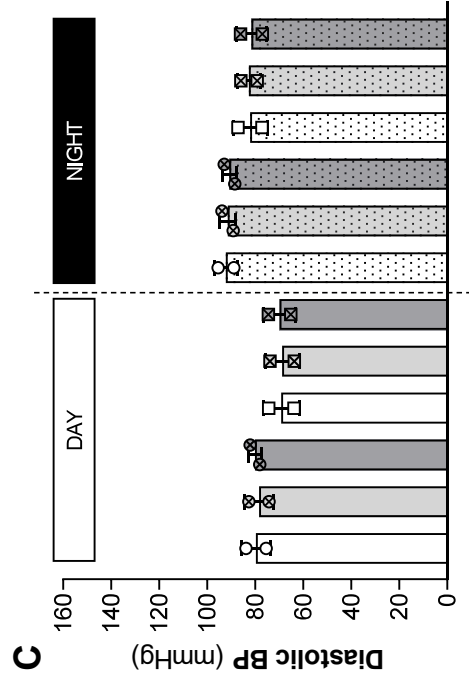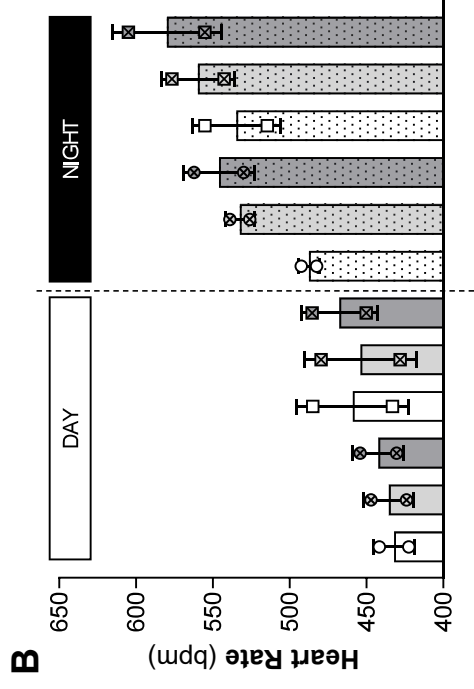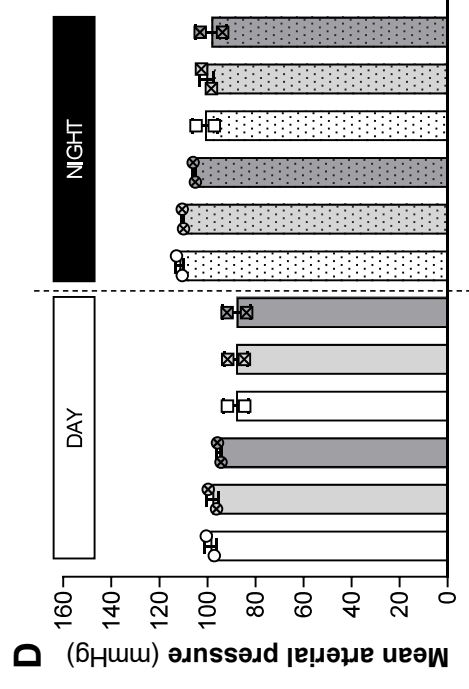

Supplementary Figure S2

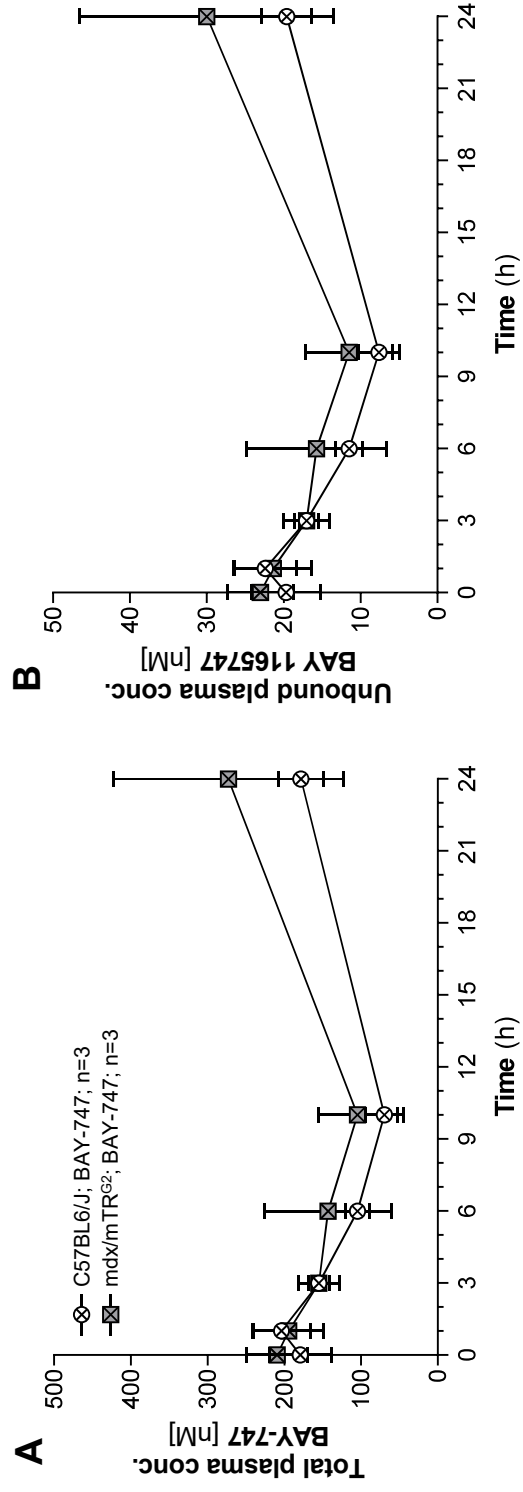

Supplementary Figure S3

Supplement: s1 [file s1]
